# Supplementary material for: Deactivatable Bisubstrate Inhibitors of Protein Kinases
Source: MDPI journal article supplement (doi:10.3390/molecules27196689), 2022-10-08

# Deactivatable Bisubstrate Inhibitors of Protein Kinases

Tanel Sõrmus, Darja Lavogina, Erki Enkvist, Asko Uri and Kaido Viht\*

Institute of Chemistry, University of Tartu, 14A Ravila St., 50411 Tartu, Estonia; tanel.sormus@ut.ee (T.S.); darja.lavogina@ut.ee (D.L.); erki.enkvist@ut.ee (E.E.); asko.uri@ut.ee (A.U.). \*Correspondence: kaido.viht@ut.ee; Tel.: +372-737-5250

## Electronic Supplementary Information

### Contents

|                                                                                                                    |    |
|--------------------------------------------------------------------------------------------------------------------|----|
| S1. Supplementary schemes, figures, and tables .....                                                               | 2  |
| S2. NMR spectra .....                                                                                              | 9  |
| S2.1 Compound 5; <sup>1</sup> H and <sup>13</sup> C spectra. ....                                                  | 9  |
| S2.2 Compound 6; <sup>1</sup> H and <sup>13</sup> C spectra. ....                                                  | 11 |
| S2.3 Compound 7; <sup>1</sup> H spectra. ....                                                                      | 13 |
| S2.4 Compound 3; <sup>1</sup> H spectra. ....                                                                      | 14 |
| S2.5 Compound 8; <sup>1</sup> H spectra. ....                                                                      | 15 |
| S3. HPLC chromatograms and UV-Vis spectra of the main peaks of compounds 2a, 10, 11a, ARC-2121, and ARC-2194 ..... | 17 |
| S3.1 Compound 2a .....                                                                                             | 17 |
| S3.2 Compound 10 .....                                                                                             | 18 |
| S3.3 Compound 11a .....                                                                                            | 19 |
| S3.4 ARC-2121 .....                                                                                                | 20 |
| S3.5 ARC-2194 .....                                                                                                | 21 |

## S1. Supplementary schemes, figures, and tables

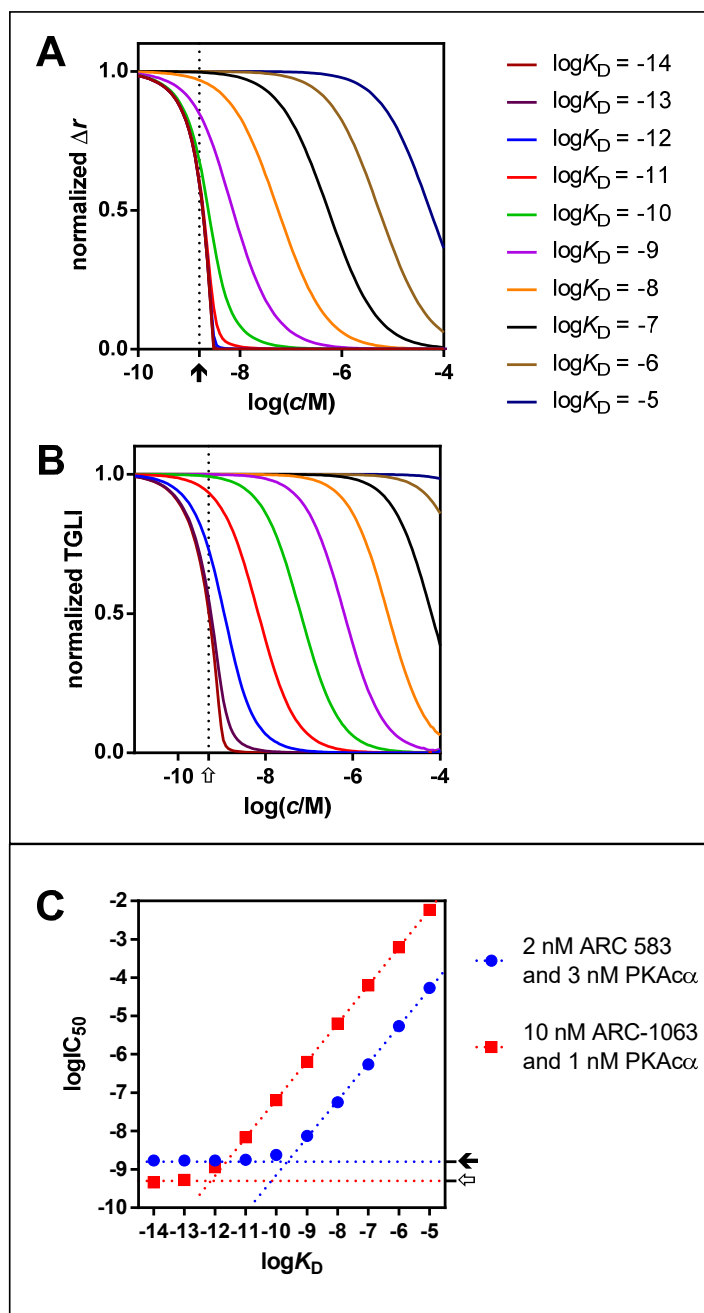

**Figure S1.** Simulated displacement binding curves. (A) and (B) Theoretical displacement curves simulated by Graphpad Prism software (v 6.04) for compounds covering the range of  $K_D$  values from 10 fM to 10  $\mu$ M (specified in Figure legend). (A) The curves correspond to the **Equation (A3)** (in Appendix A) with the following parameters:  $K_D^*(\text{ARC-583:PKA}\alpha\alpha) = 0.5$  nM,  $[\text{PKA}\alpha\alpha]_T = 3$  nM,  $[\text{ARC-583}]_T = 2$  nM, and  $Q = 0.8$ . (B) The curves correspond to the **Equation (A12)** (in Appendix A) with the following parameters:  $K_D^*(\text{ARC-Lum(Fluo):PKA}\alpha\alpha) = 15$  pM,  $[\text{PKA}\alpha\alpha]_T = 1$  nM, and  $[\text{ARC-Lum(Fluo)}]_T = 10$  nM, where ARC-Lum(Fluo) corresponds to either ARC-1063 or ARC-1182. (C) The displacement curves from (A) and (B) were analyzed by sigmoidal dose-response model and the corresponding logIC<sub>50</sub> values were plotted as functions of logK<sub>D</sub> values of the corresponding displacement curves. (A-C) The tight binding limits of IC<sub>50</sub> values at the corresponding assay conditions are indicated by white and black arrows.

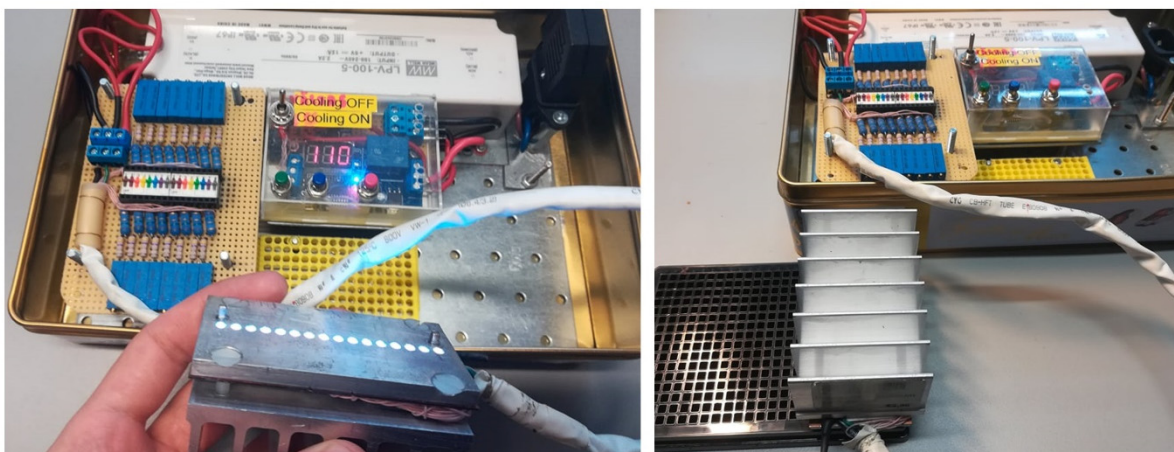

**Figure S2.** Photos of the custom-made LED array. The timer-equipped custom-made LED array accommodating 16 LEDs [150 mcd,  $\lambda_{\text{max}} = 365$  nm, 975 mW, part number LTPL-C034UVH385] designed for irradiation of one row of wells at a time in a 384-well microtiter plate.

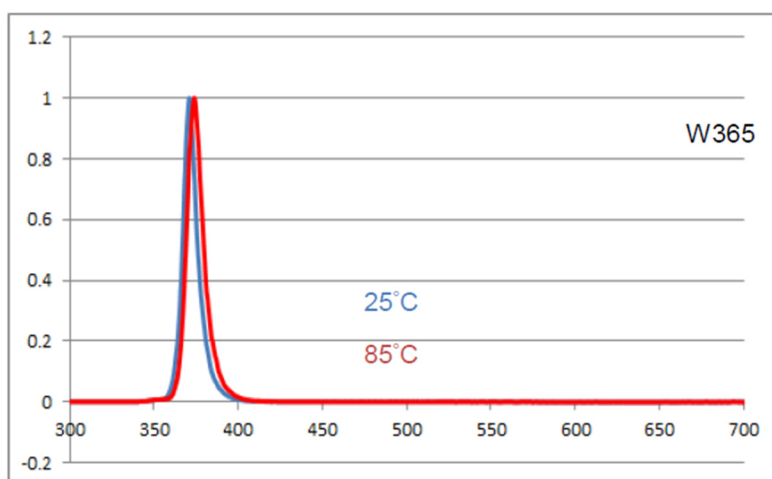

**Figure S3.** Relative spectral distribution of 365 nm LEDs. The blue and red lines correspond to the spectral distribution of LEDs at 25 °C and 85 °C, respectively (from manufacturer's datasheet).

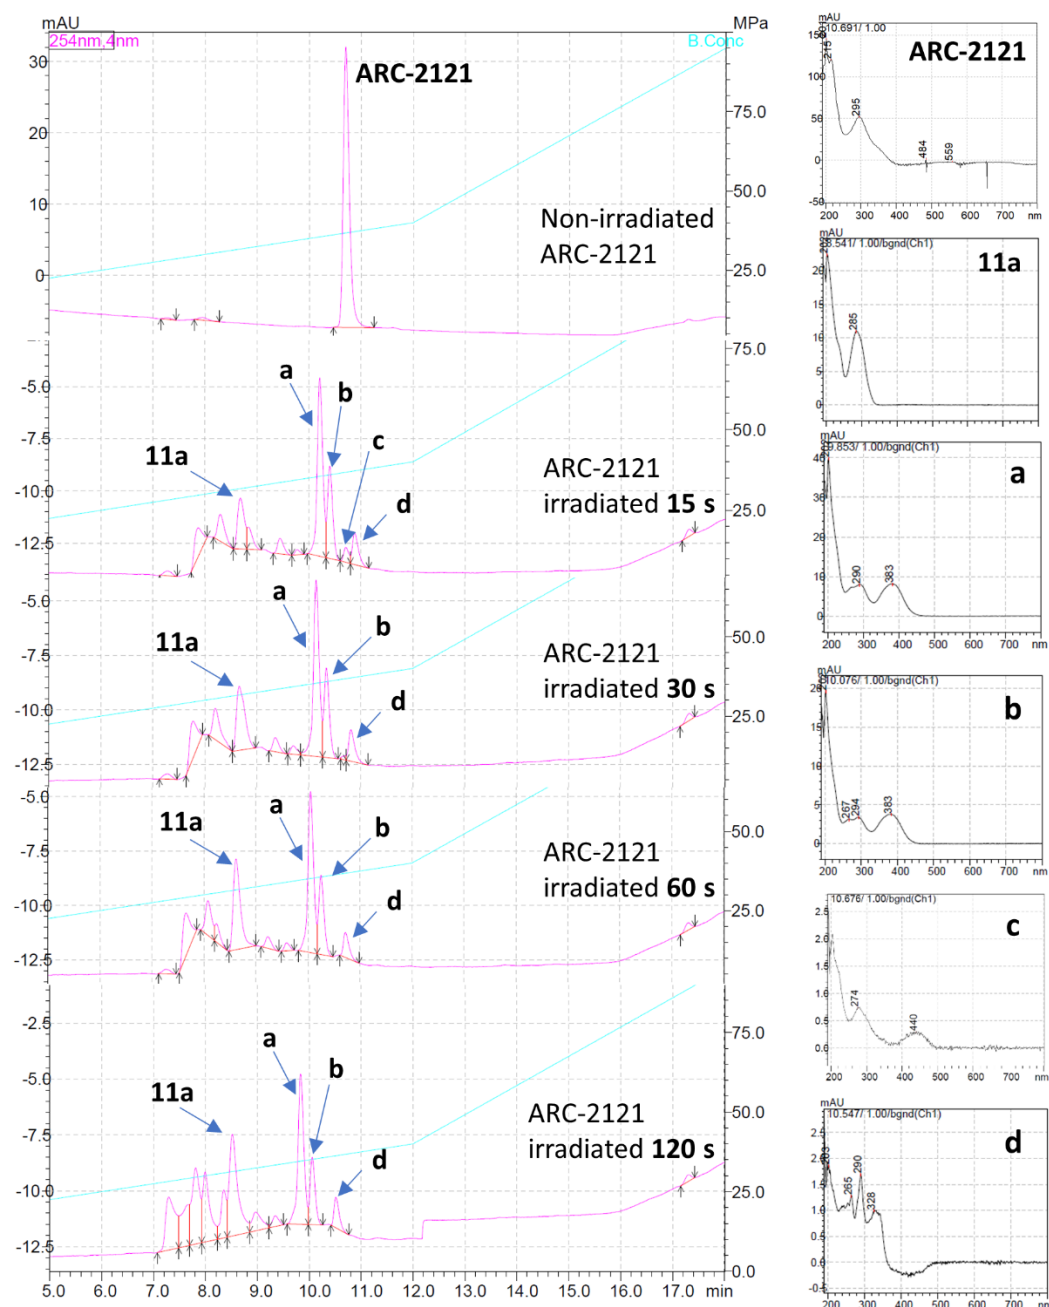

**Figure S4.** HPLC analysis of ARC-2121 non-irradiated and irradiated. ARC-2121 was irradiated for various durations (15 s, 30 s, 60 s, 120 s) using the custom-made LED array at 365 nm. (a)-(d) UV-Vis spectra of the peaks corresponding to the unidentified photolysis products of ARC-2121.

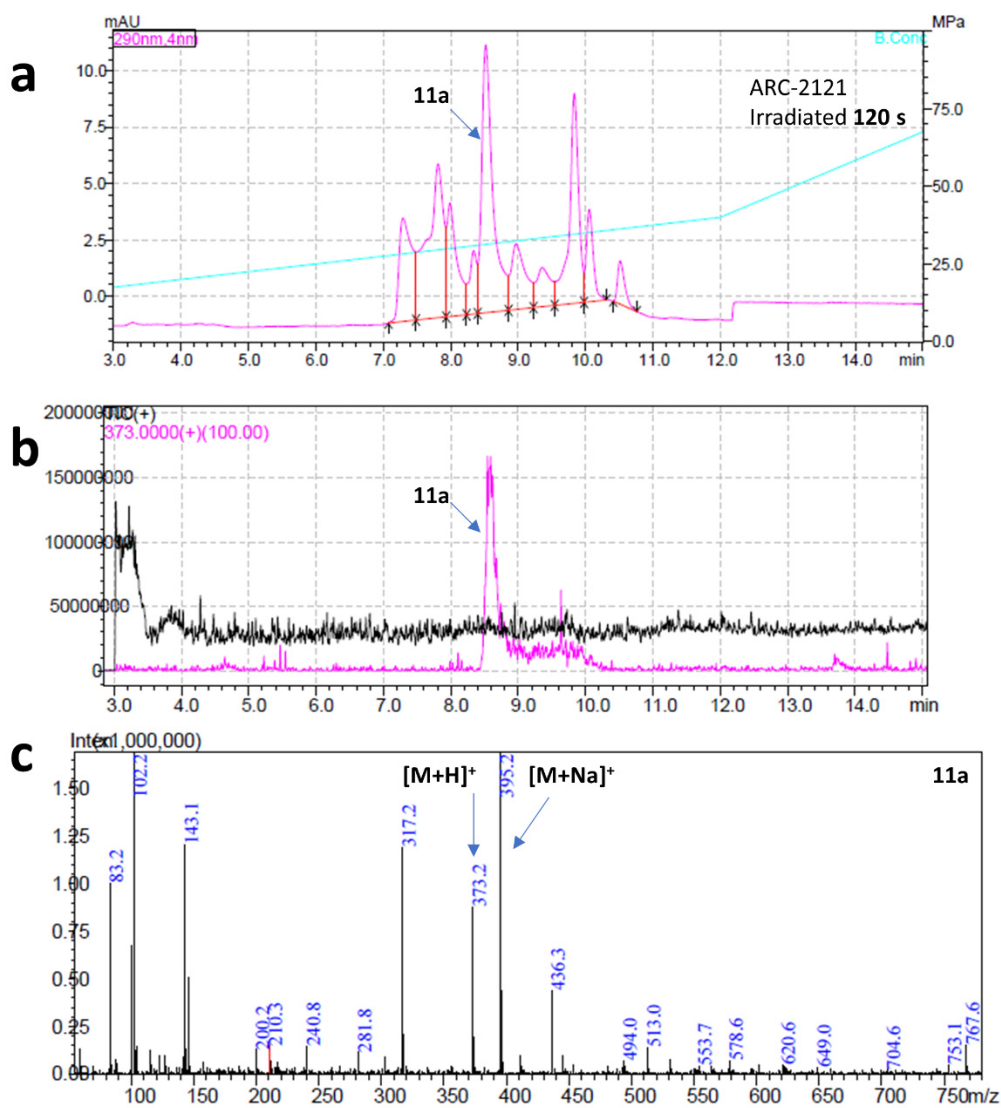

**Figure S5.** ESI-MS spectra of **11a** produced by irradiation of ARC-2121 for 120 s. (a) HPLC chromatogram; (b) and (c) ESI-MS spectra of **11a**.

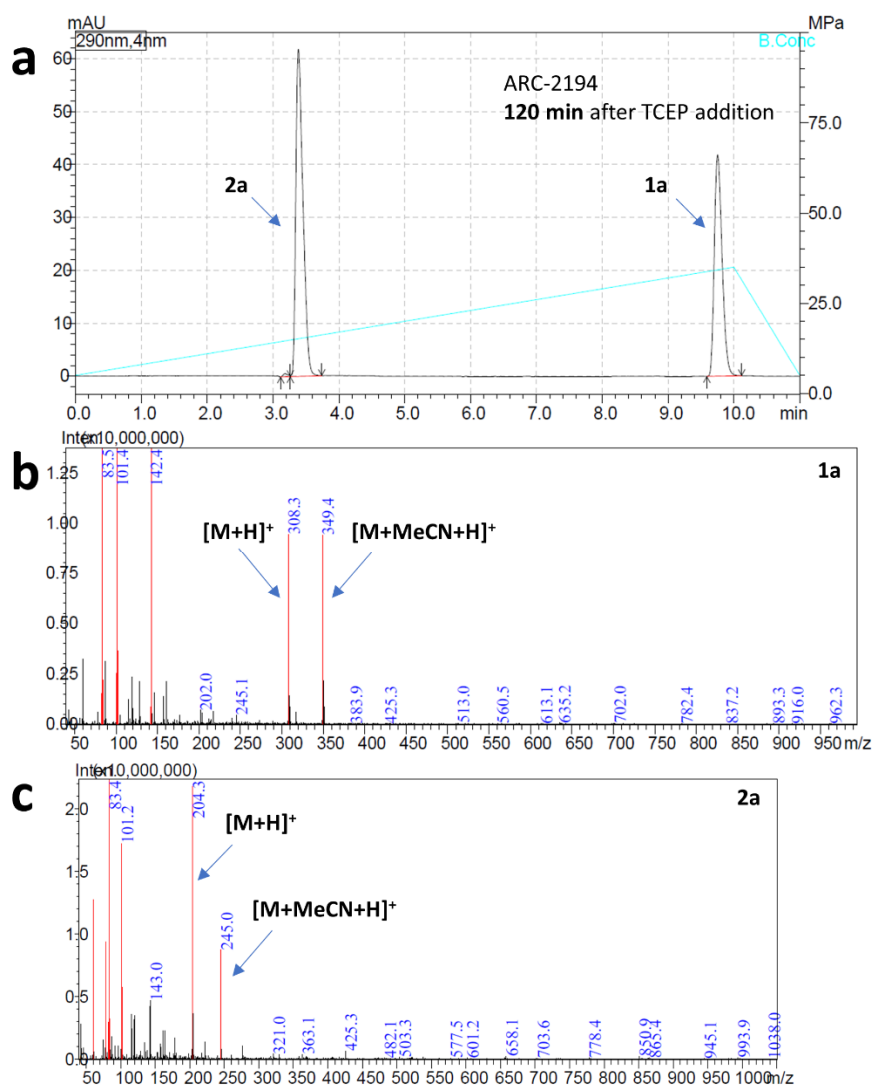

**Figure S6.** ESI-MS spectra of **1a** and **2a** produced by reduction of ARC-2194. **(a)** HPLC chromatogram; **(b)** **1a** and **(c)** **2a** ESI-MS spectra.

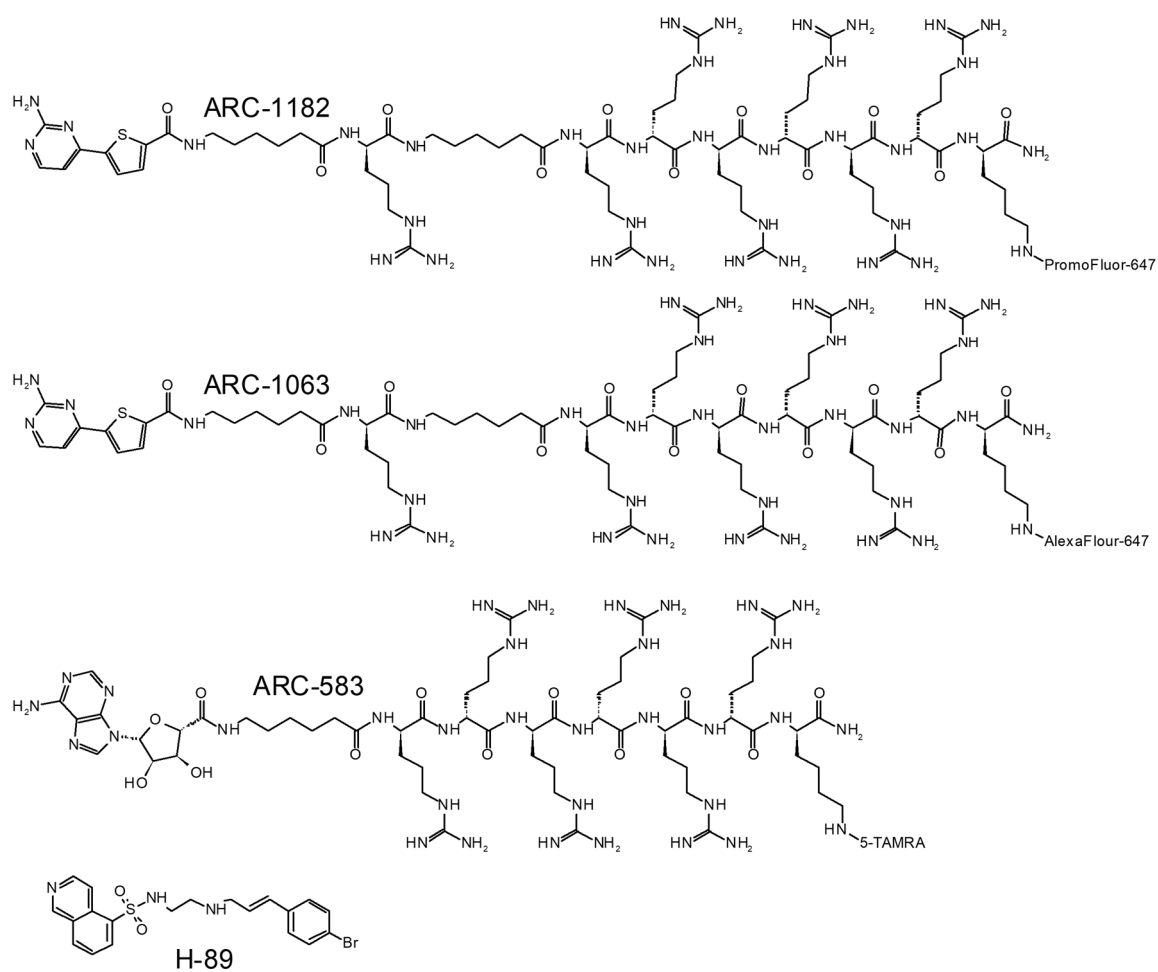

**Figure S7.** Structures of photoluminescent probes ARC-1182, ARC-1063, and ARC-583 and reference compound H89.

**Table S1.** Analytical data for novel compounds **10**, **11a**, ARC-2121, and ARC-2194

| Compound code | Molecular formula                                                              | MW (neutral form) | MS Data<br><i>M/z</i>                                                                                                                                                                       | HPLC data                  |                                     |
|---------------|--------------------------------------------------------------------------------|-------------------|---------------------------------------------------------------------------------------------------------------------------------------------------------------------------------------------|----------------------------|-------------------------------------|
|               |                                                                                |                   |                                                                                                                                                                                             | <i>t<sub>R</sub></i> / min | Purity (HPLC peak area % at 254 nm) |
| <b>10</b>     | C <sub>51</sub> H <sub>82</sub> N <sub>26</sub> O <sub>11</sub>                | 1235.37           | [M+2H] <sup>2+</sup> calculated for C <sub>51</sub> H <sub>84</sub> N <sub>26</sub> O <sub>11</sub> <sup>2+</sup> 618.3401; found: 618.3401 <sup>a</sup>                                    | 7.7 <sup>d</sup>           | 96.5                                |
| <b>11a</b>    | C <sub>19</sub> H <sub>28</sub> N <sub>6</sub> O <sub>2</sub>                  | 372.47            | [M+H] <sup>+</sup> calculated for C <sub>19</sub> H <sub>29</sub> N <sub>6</sub> O <sub>2</sub> <sup>+</sup> 373.2347; found: 373.2347 <sup>a</sup>                                         | 7.8 <sup>d</sup>           | 98.9                                |
| ARC-2121      | C <sub>70</sub> H <sub>110</sub> N <sub>32</sub> O <sub>12</sub>               | 1591.83           | [M+2H+TFA] <sup>2+</sup> calculated for C <sub>72</sub> H <sub>112</sub> N <sub>32</sub> O <sub>14</sub> F <sub>3</sub> <sup>2+</sup> 853.5; found: 853.7 <sup>b</sup>                      | 10.7 <sup>c</sup>          | 98.0                                |
| ARC-2194      | C <sub>52</sub> H <sub>94</sub> N <sub>30</sub> O <sub>10</sub> S <sub>2</sub> | 1363.63           | [M+3H+2TFA] <sup>3+</sup> calculated for C <sub>56</sub> H <sub>99</sub> N <sub>30</sub> O <sub>14</sub> S <sub>2</sub> F <sub>6</sub> <sup>3+</sup> 531.2429; found: 531.2418 <sup>a</sup> | 6.2 <sup>d</sup>           | 97.3                                |

<sup>a</sup> ESI HRMS; <sup>b</sup> ESI MS; <sup>c</sup> 0.1% TFA/(10 – 40% MeCN/H<sub>2</sub>O in 12 min); <sup>d</sup> 0.1% TFA/(10 – 70% MeCN/H<sub>2</sub>O in 20 min)



## S2. NMR spectra

### S2.1 Compound 5; $^1\text{H}$ and $^{13}\text{C}$ spectra.

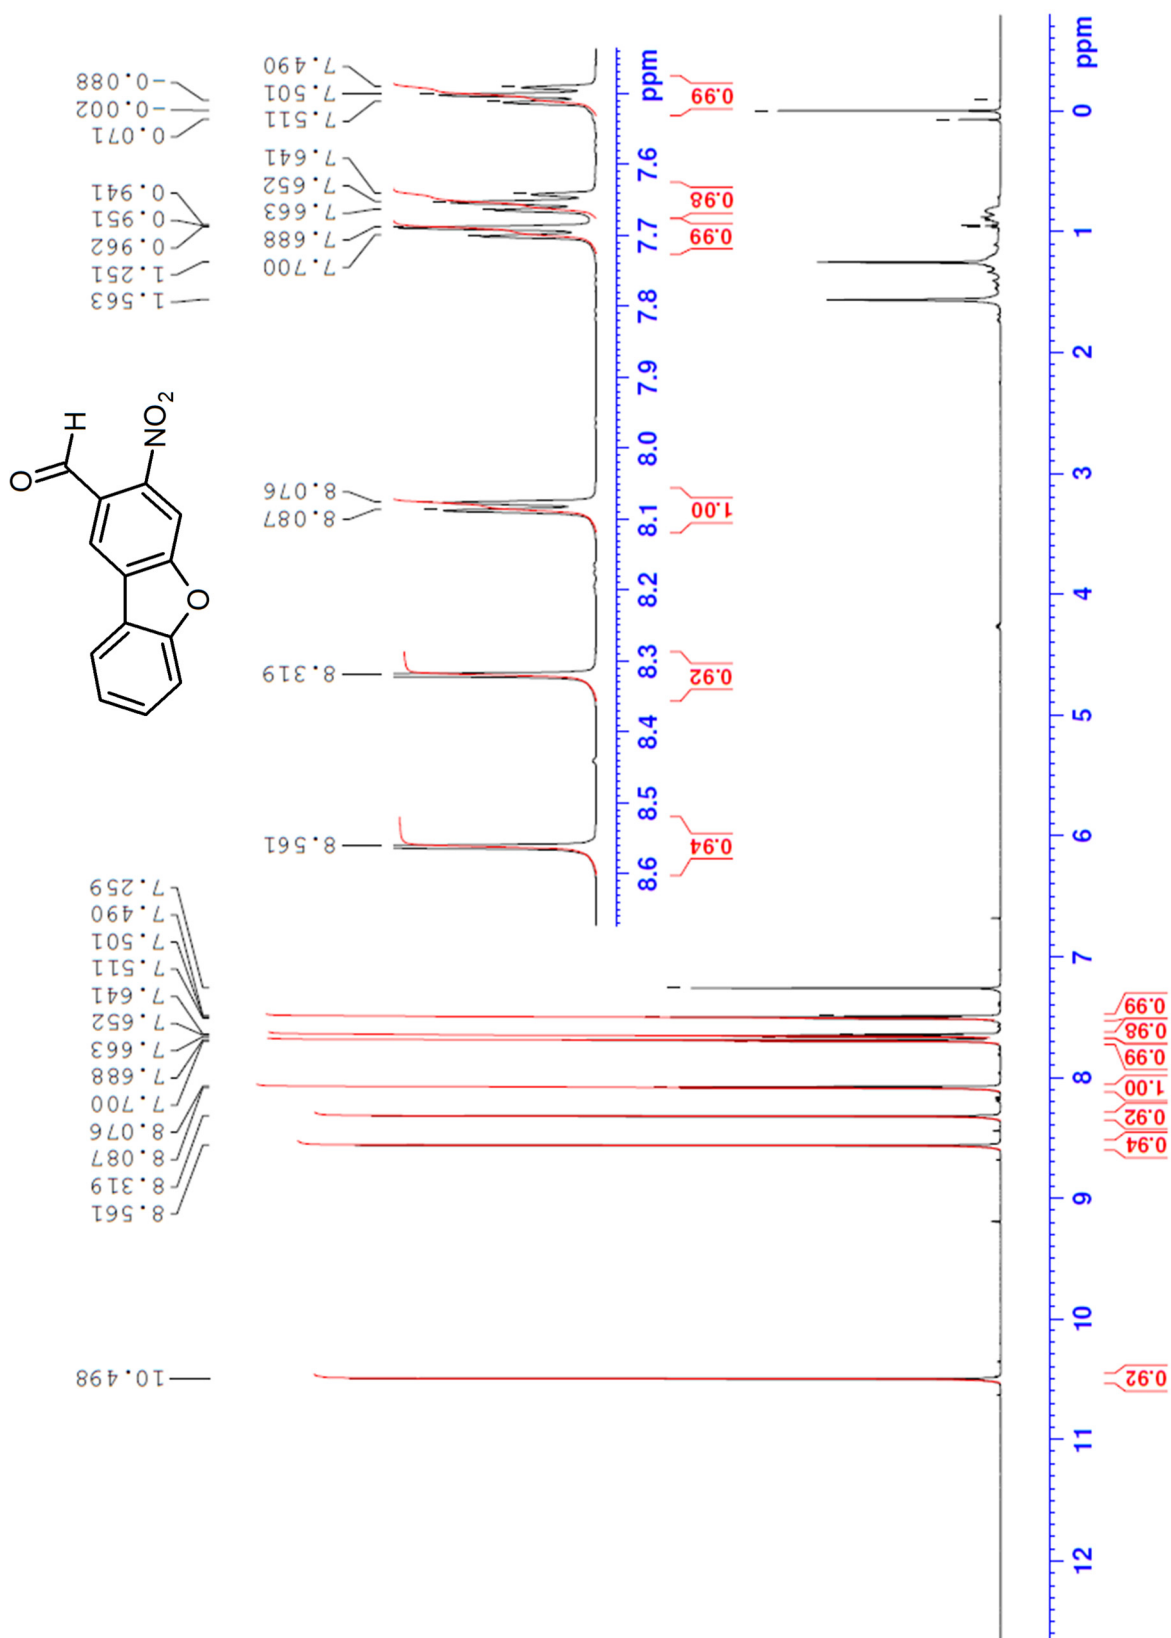

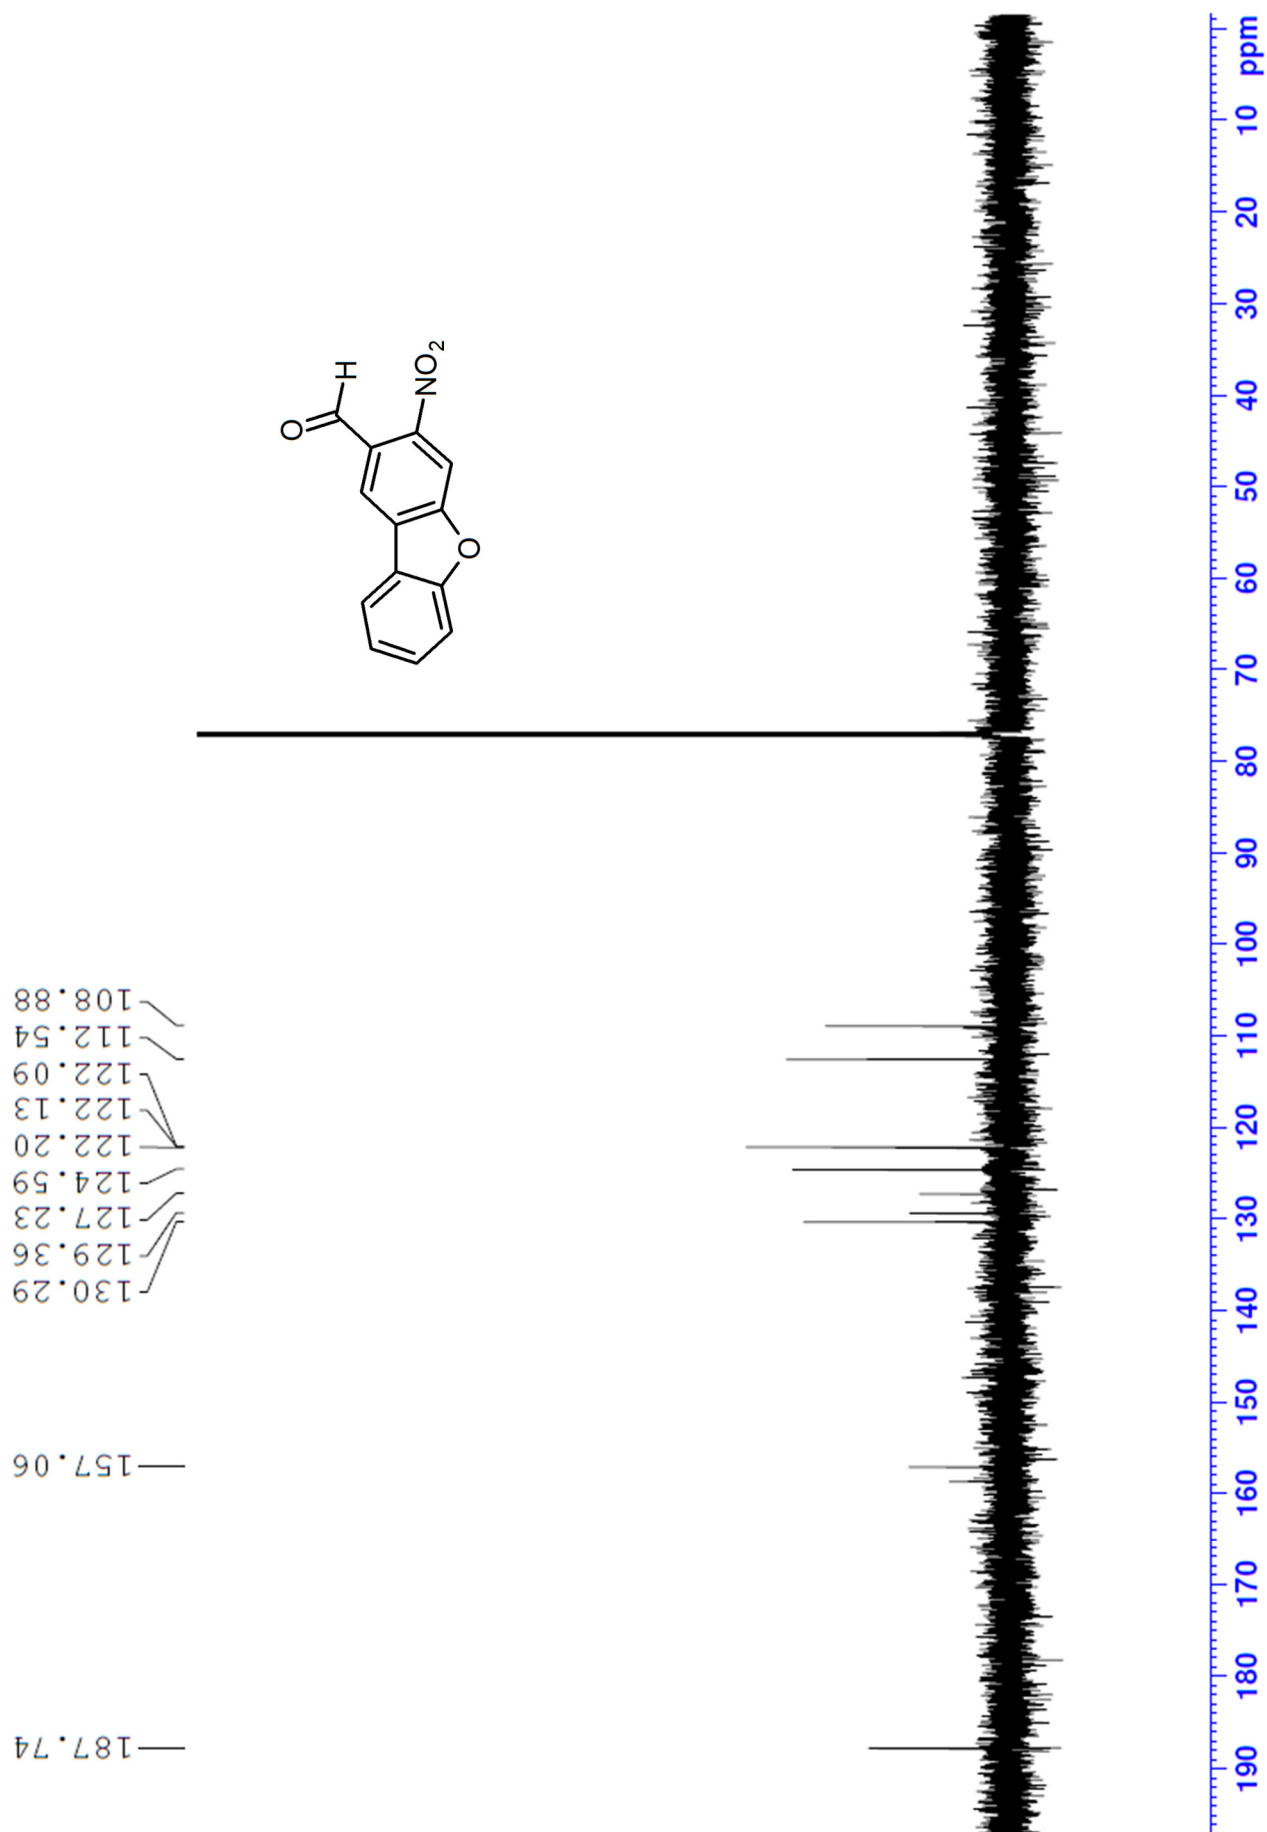

S2.2 Compound 6;  $^1\text{H}$  and  $^{13}\text{C}$  spectra.

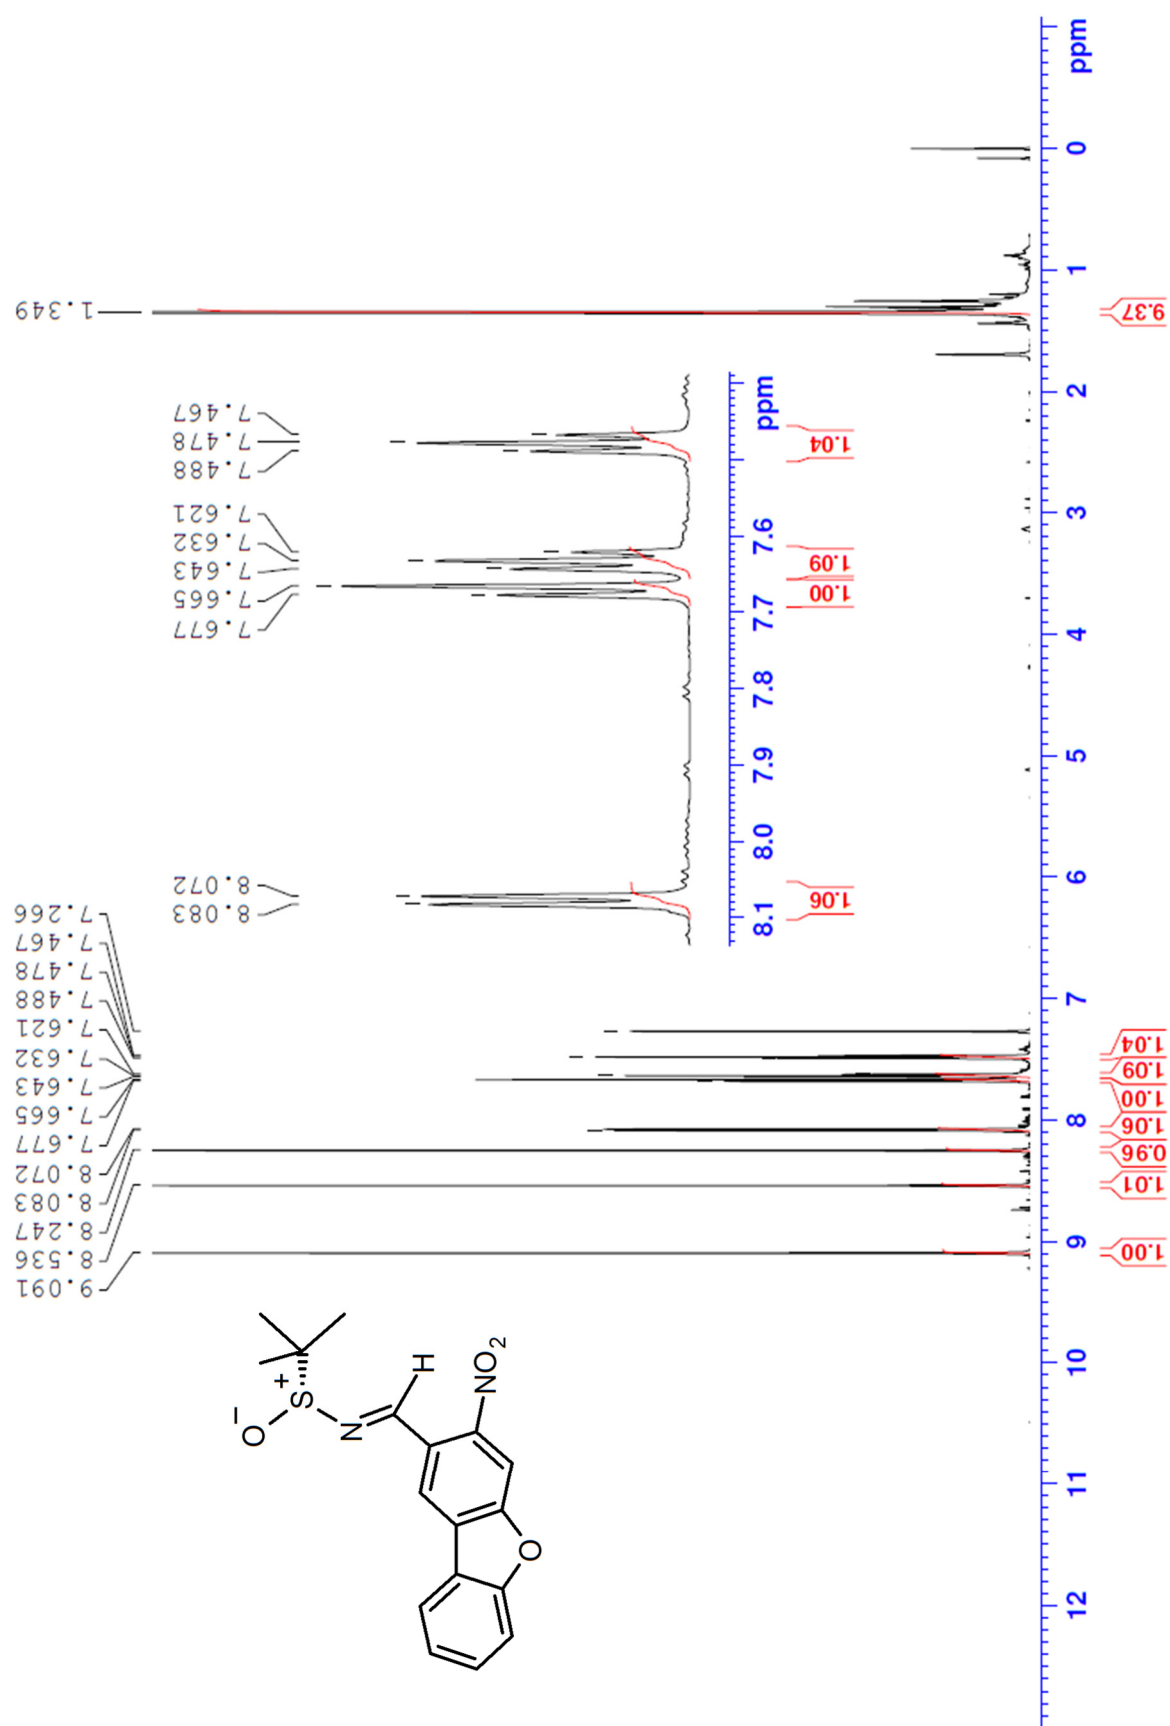

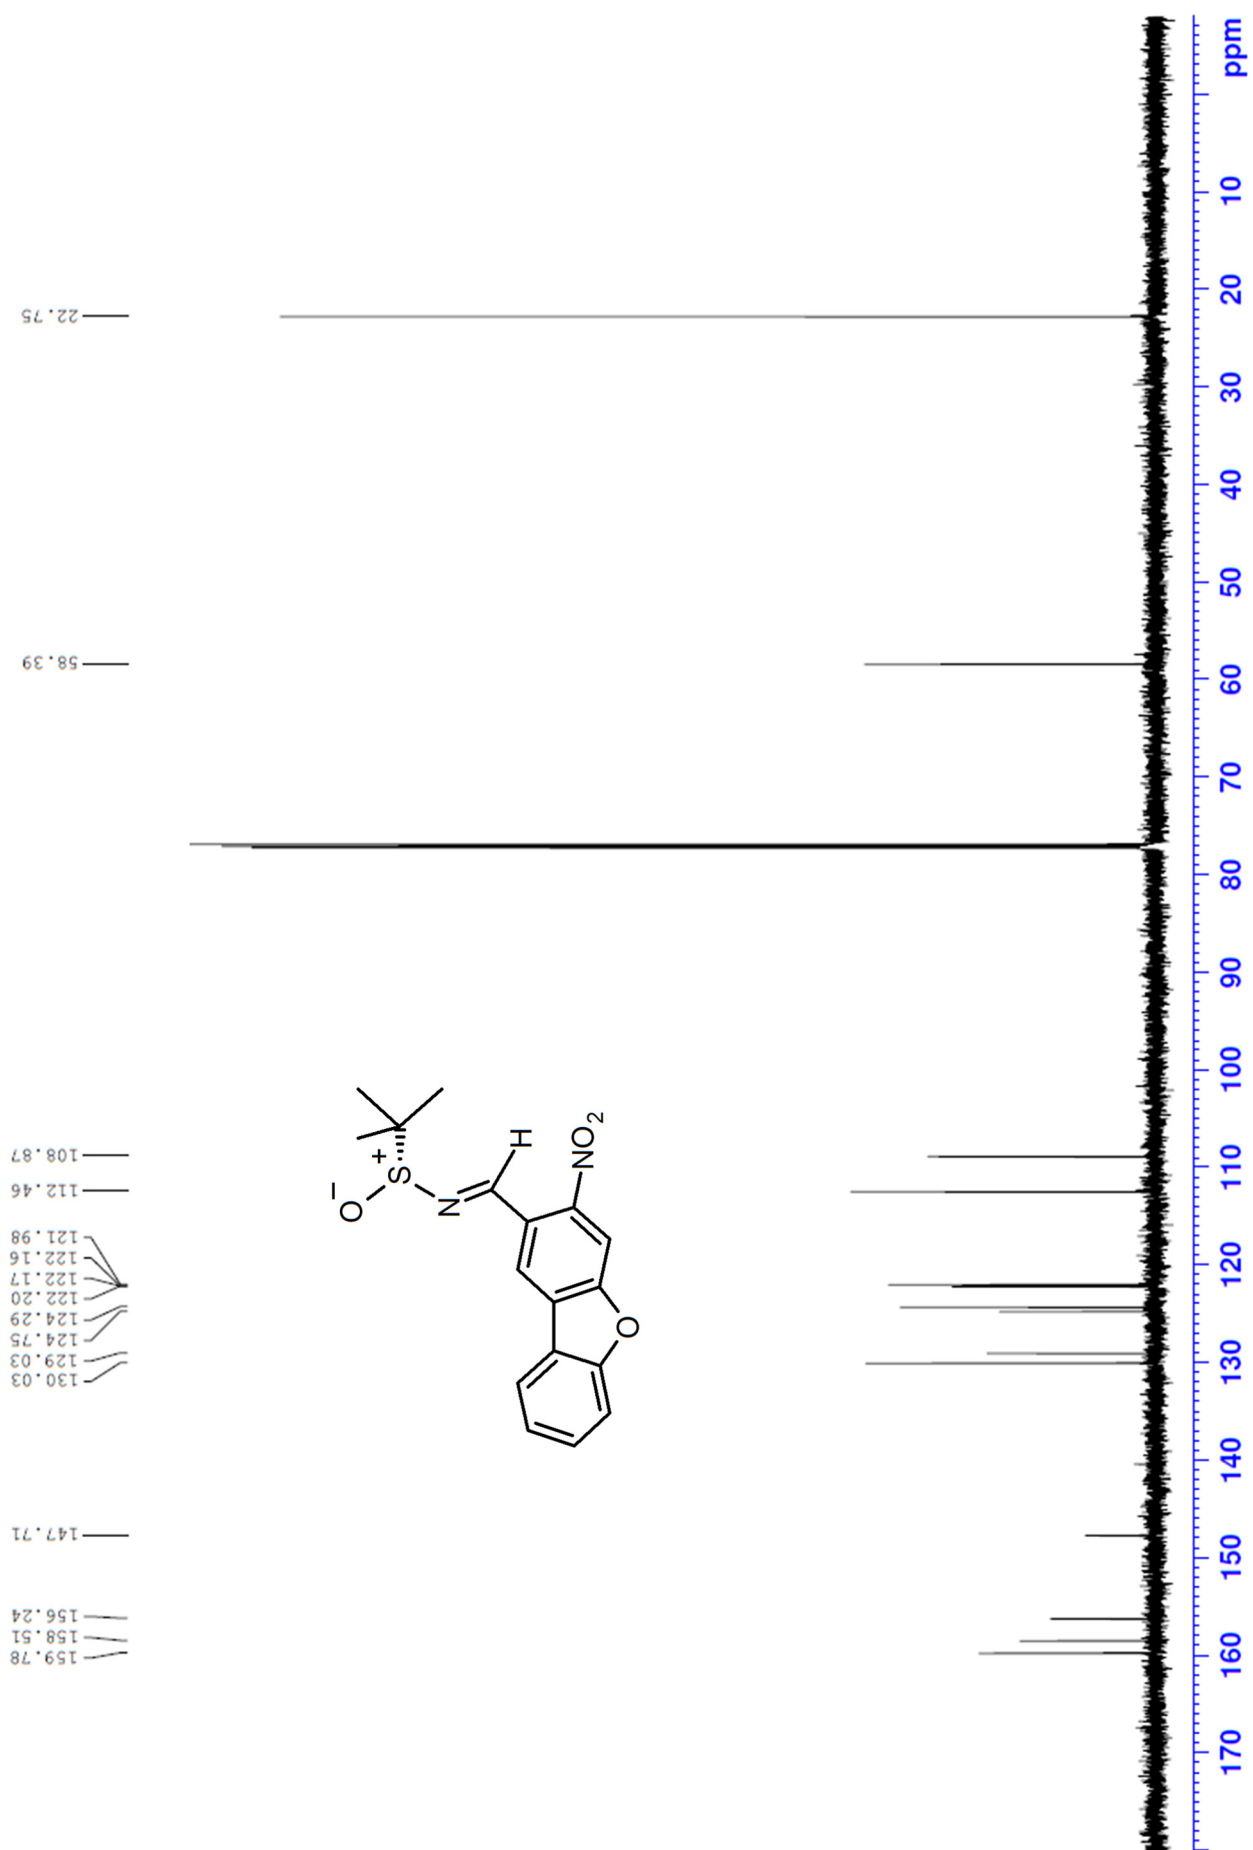

**Chemical structure of compound 10:**

CC(C)(C)OC(=O)C[C@H](N)C1=CC(=C2C=C1OC2=CC=C1)[N+](=O)[O-]

**<sup>1</sup>H NMR spectrum (CDCl<sub>3</sub>) data:**

| Chemical Shift (ppm) | Integration      |
|----------------------|------------------|
| 8.2 - 8.1            | 1.15, 1.11       |
| 8.1                  | 1.00             |
| 7.6                  | 1.11, 1.14, 1.16 |
| 7.5                  | 1.16             |
| 5.52                 | 1.11             |
| 5.05                 | 1.02             |
| 3.1                  | 1.31, 1.04       |
| 1.0 - 1.2            | 9.43, 10.20      |

O=C(O)C[C@H](NC(=O)OCc1c2ccccc2c3ccccc13)c4cc5c(cc4)[nH]c6ccccc65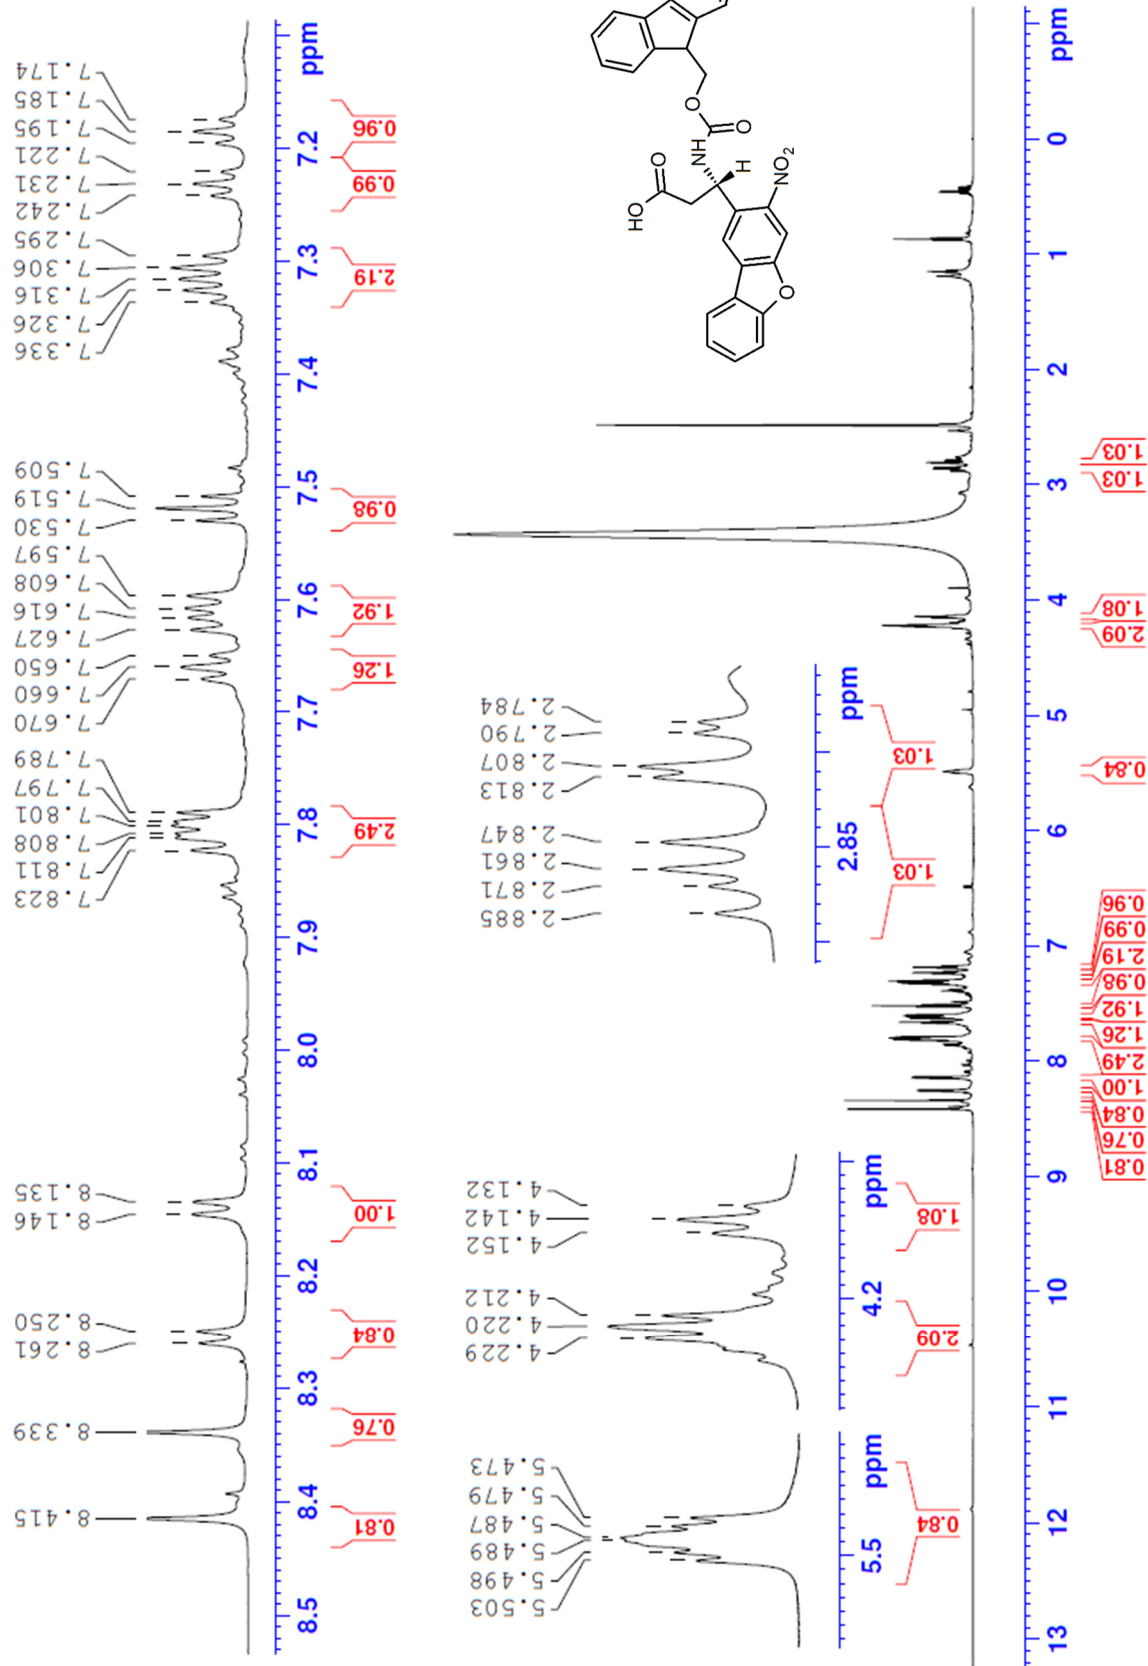

S6.5 Compound 8;  $^1\text{H}$  spectra.

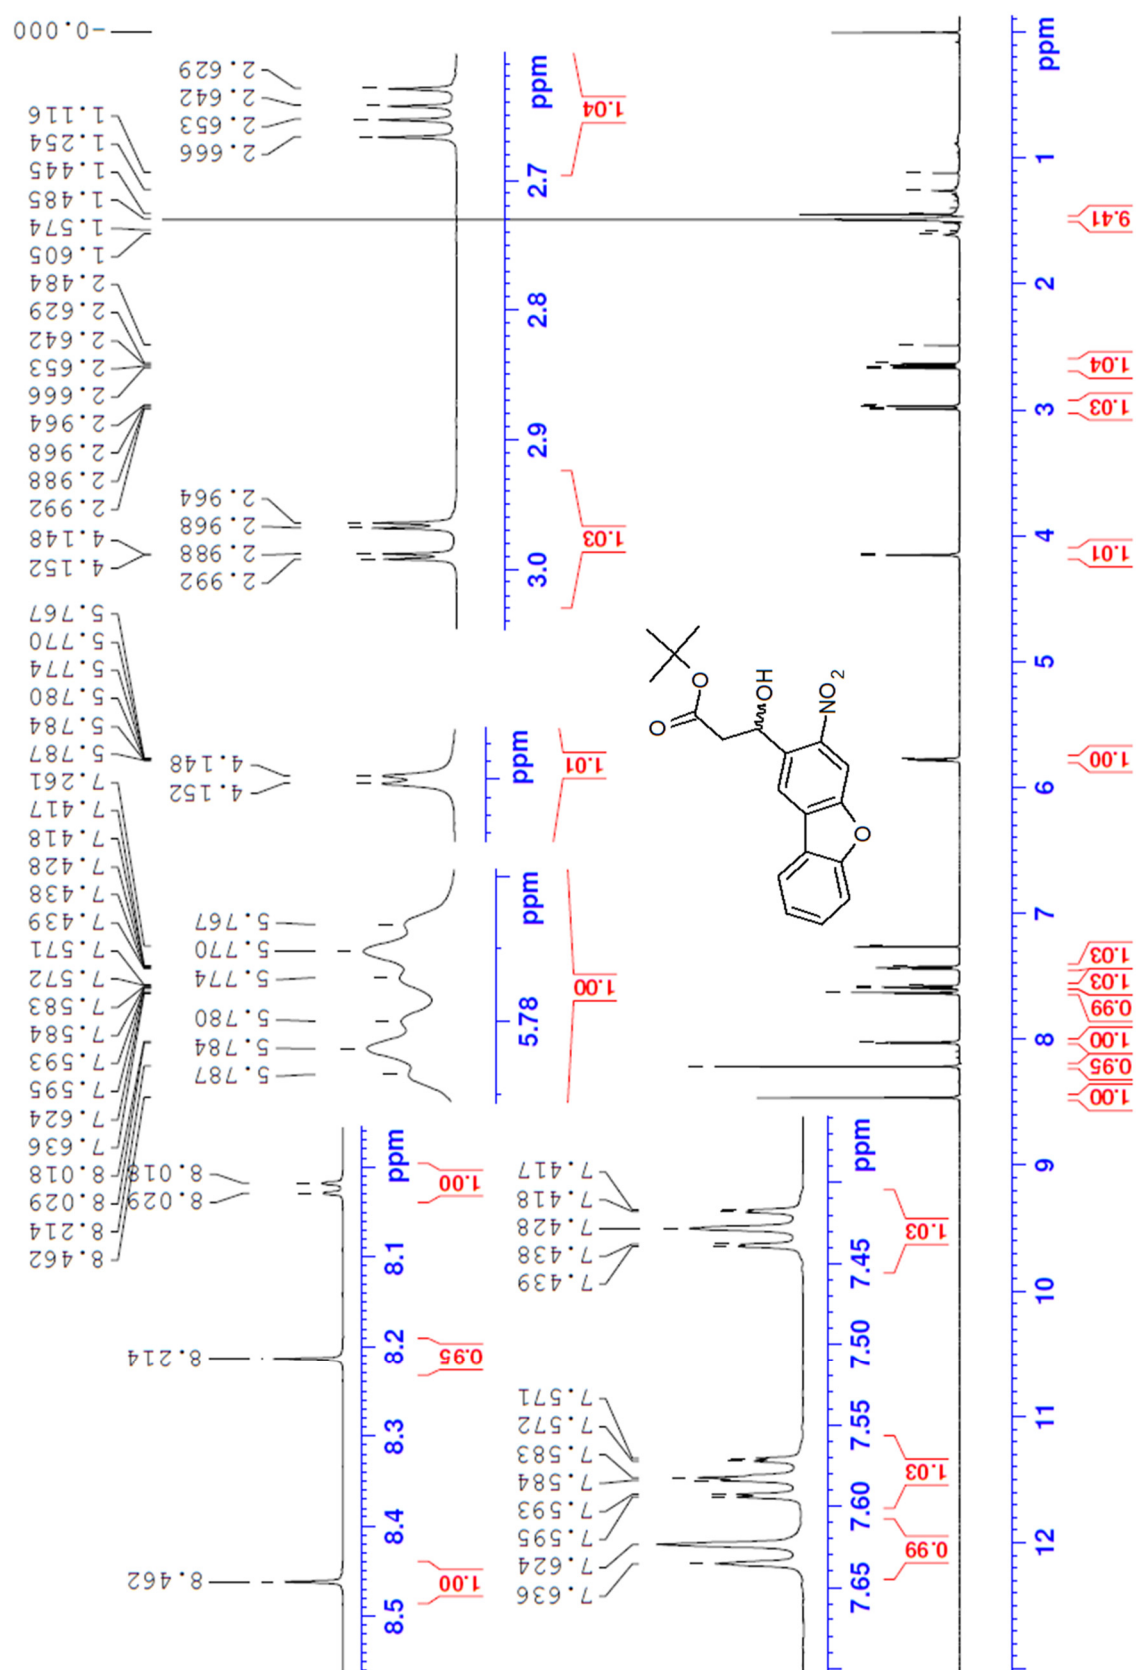

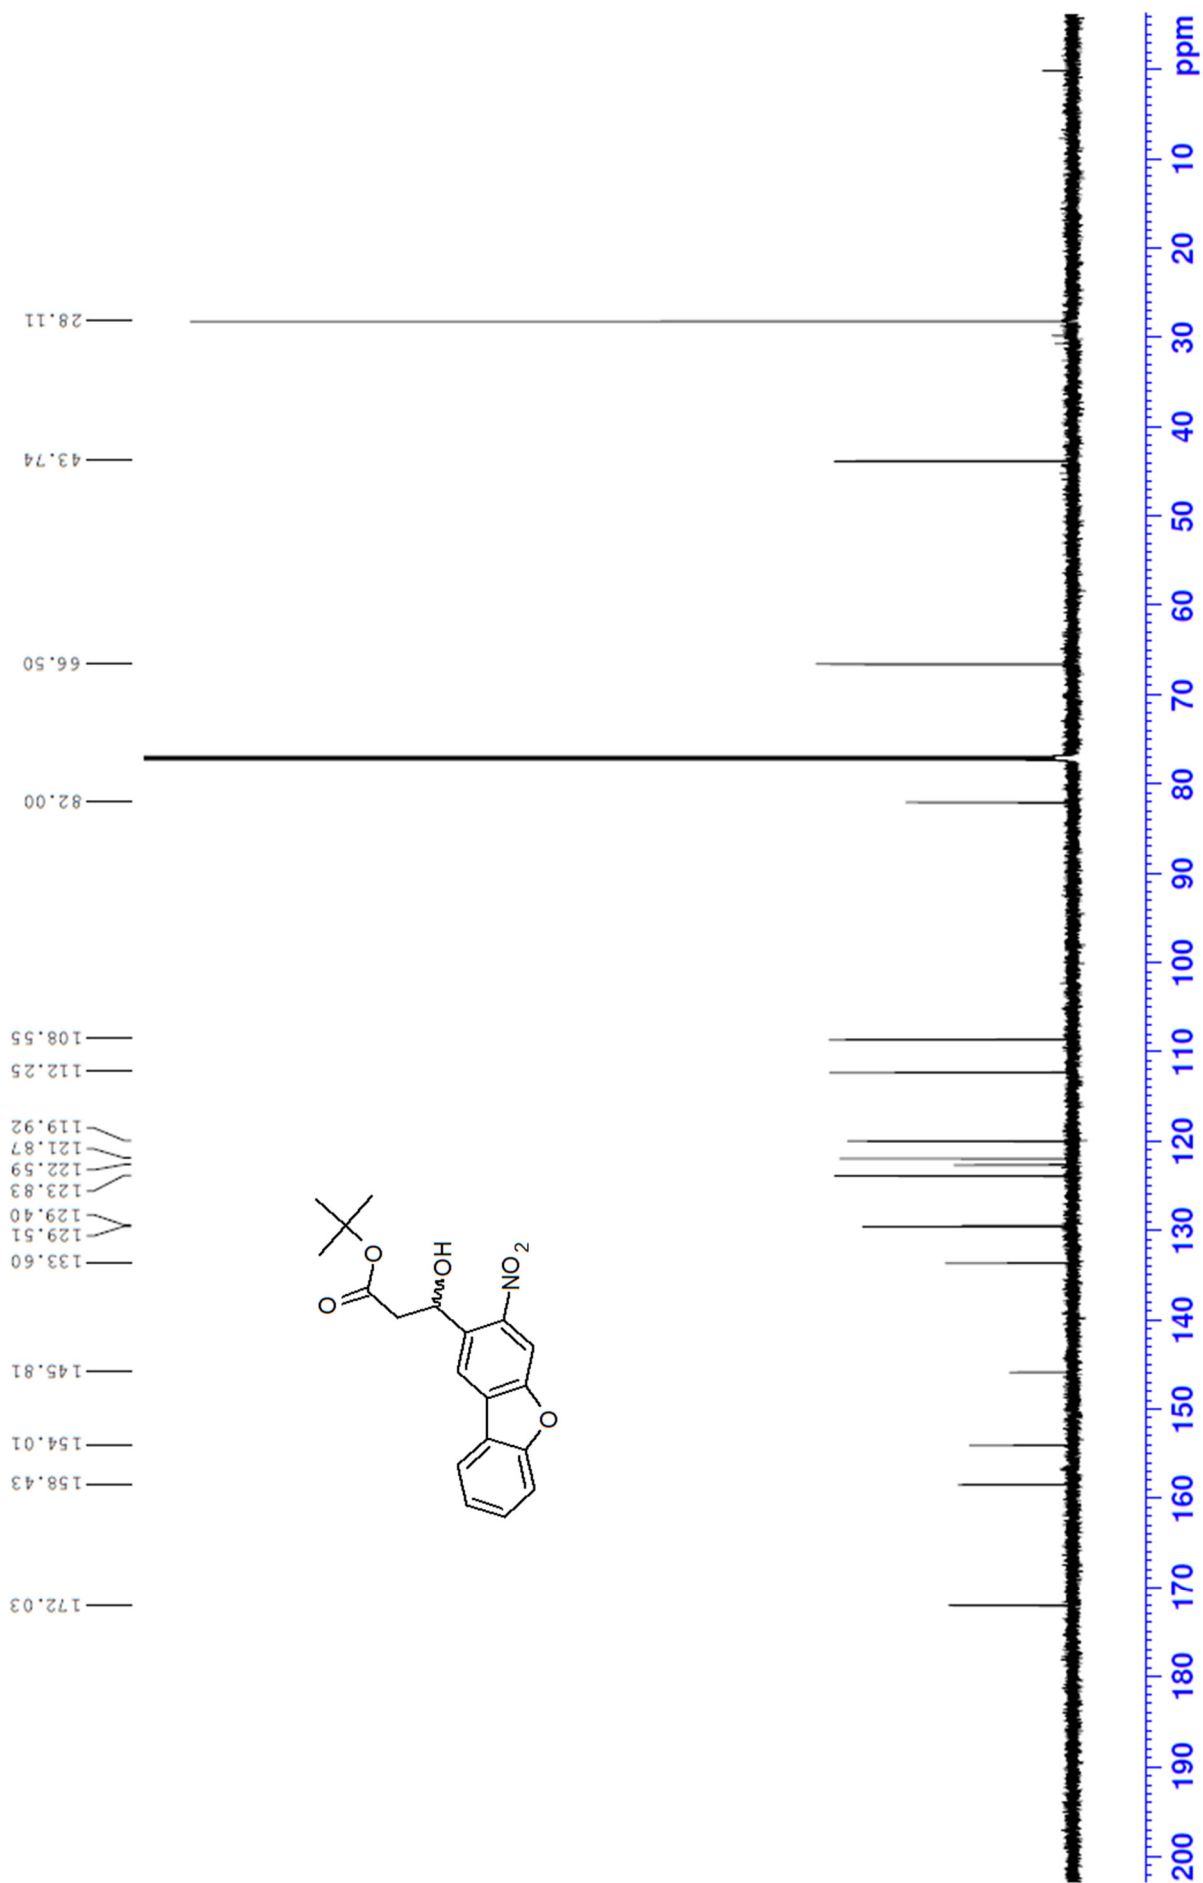



### S3. HPLC chromatograms and UV-Vis spectra of the main peaks of compounds 2a, 10, 11a, ARC-2121, and ARC-2194

#### S3.1 Compound 2a

Gradient: 0.1% TFA/(5 – 75% MeCN/H<sub>2</sub>O in 20 min)

mAU

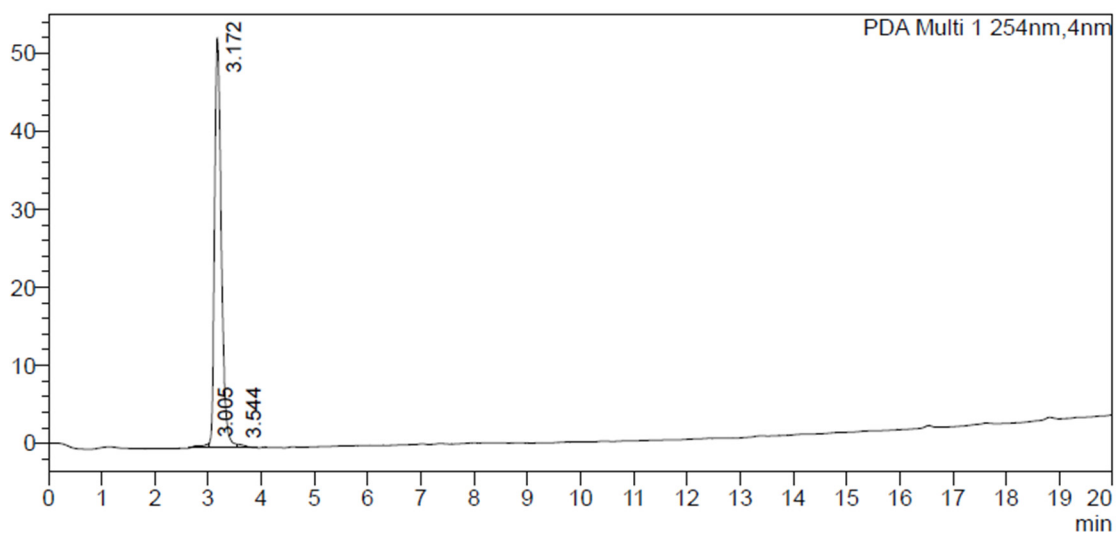

Peak Table

PDA Ch1 254nm

| Peak# | Ret. Time | Area   | Area%   |
|-------|-----------|--------|---------|
| 1     | 3.005     | 5622   | 1.187   |
| 2     | 3.172     | 463579 | 97.861  |
| 3     | 3.544     | 4512   | 0.953   |
| Total |           | 473714 | 100.000 |

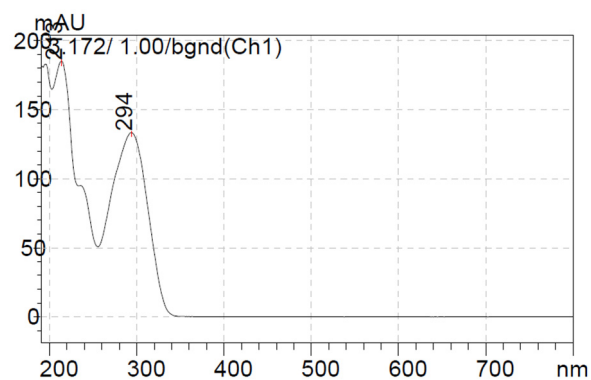

### S3.2 Compound 10

Gradient: 0.1% TFA/(10 – 70% MeCN/H<sub>2</sub>O in 20 min)

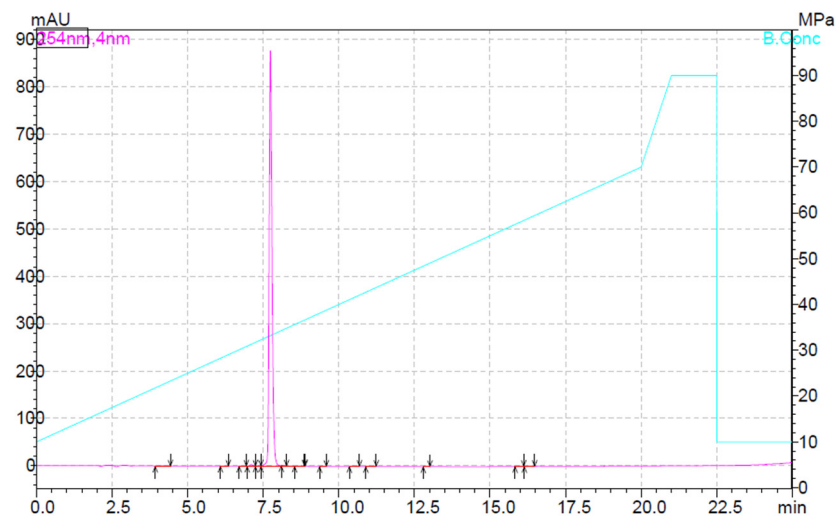

Peak Table

PDA Ch1 254nm

| Peak# | Ret. Time | Area    | Area%   |
|-------|-----------|---------|---------|
| 1     | 1.932     | 17242   | 0.288   |
| 2     | 2.430     | 60827   | 1.015   |
| 3     | 2.926     | 45866   | 0.765   |
| 4     | 4.048     | 11216   | 0.187   |
| 5     | 6.178     | 1157    | 0.019   |
| 6     | 6.810     | 1401    | 0.023   |
| 7     | 7.094     | 24306   | 0.405   |
| 8     | 7.343     | 8964    | 0.150   |
| 9     | 7.735     | 5783558 | 96.473  |
| 10    | 8.142     | 1446    | 0.024   |
| 11    | 8.702     | 1946    | 0.032   |
| 12    | 9.456     | 1586    | 0.026   |
| 13    | 10.470    | 4193    | 0.070   |
| 14    | 11.028    | 4244    | 0.071   |
| 15    | 11.638    | 1905    | 0.032   |
| 16    | 12.886    | 1053    | 0.018   |
| 17    | 13.180    | 3365    | 0.056   |
| 18    | 15.135    | 1623    | 0.027   |
| 19    | 15.941    | 2754    | 0.046   |
| 20    | 16.290    | 6733    | 0.112   |
| 21    | 16.607    | 7626    | 0.127   |
| 22    | 17.351    | 2000    | 0.033   |
| Total |           | 5995011 | 100.000 |

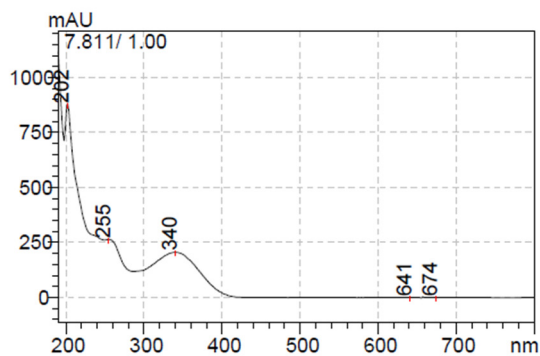

### S3.3 Compound 11a

Gradient: 0.1% TFA/(10 – 70% MeCN/H<sub>2</sub>O in 20 min)

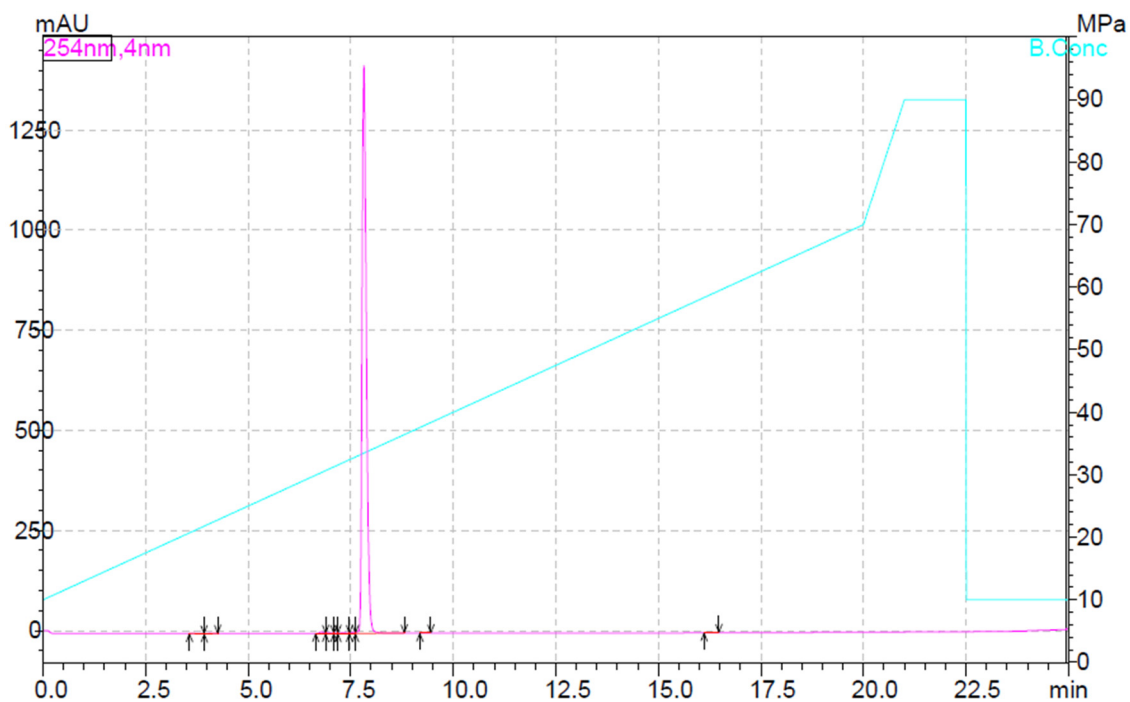

Peak Table

PDA Ch1 254nm

| Peak# | Ret. Time | Area     | Area%   |
|-------|-----------|----------|---------|
| 1     | 3.696     | 10682    | 0.103   |
| 2     | 4.064     | 13142    | 0.127   |
| 3     | 6.781     | 25510    | 0.246   |
| 4     | 6.964     | 13874    | 0.134   |
| 5     | 7.125     | 2621     | 0.025   |
| 6     | 7.318     | 18223    | 0.176   |
| 7     | 7.573     | 18596    | 0.179   |
| 8     | 7.820     | 10273470 | 98.943  |
| 9     | 9.308     | 1678     | 0.016   |
| 10    | 16.276    | 5415     | 0.052   |
| Total |           | 10383211 | 100.000 |

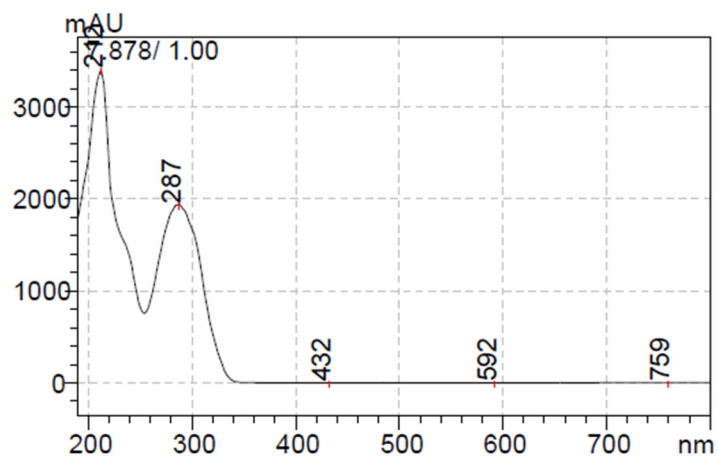

### S3.4 ARC-2121

Gradient: 0.1% TFA/(10 – 40% MeCN/H<sub>2</sub>O in 12 min)

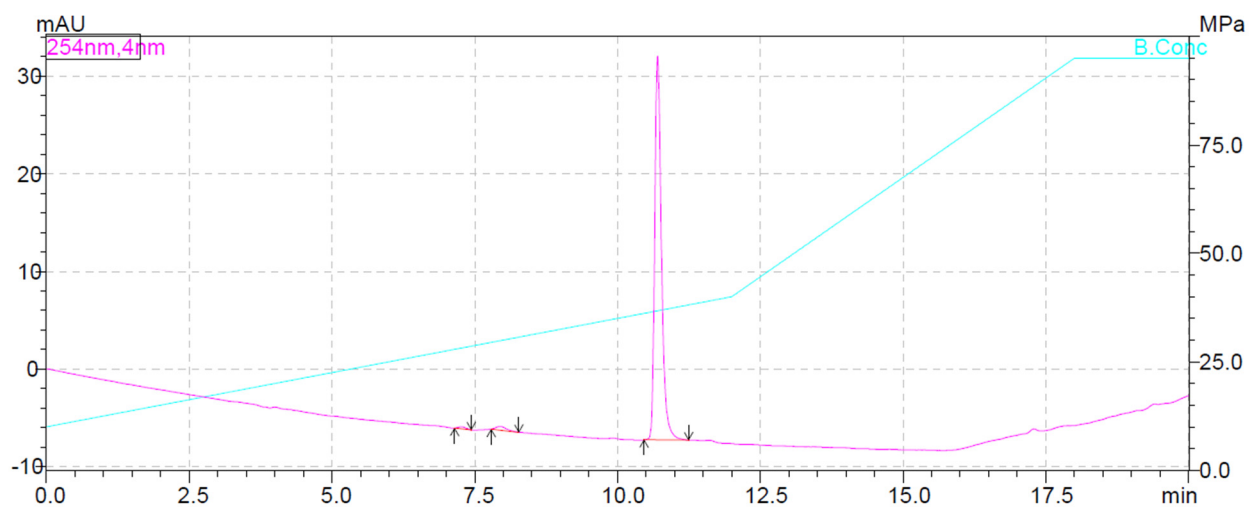

Peak Table

PDA Ch1 254nm

| Peak# | Ret. Time | Area   | Area%   |
|-------|-----------|--------|---------|
| 1     | 7.253     | 1912   | 0.581   |
| 2     | 7.952     | 4708   | 1.430   |
| 3     | 10.702    | 322612 | 97.989  |
| Total |           | 329233 | 100.000 |

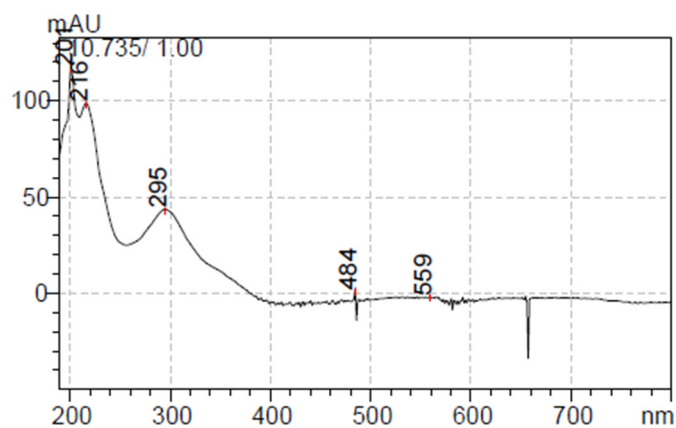

### S3.5 ARC-2194

Gradient: 0.1% TFA/(10 – 70% MeCN/H<sub>2</sub>O in 20 min)

mAU

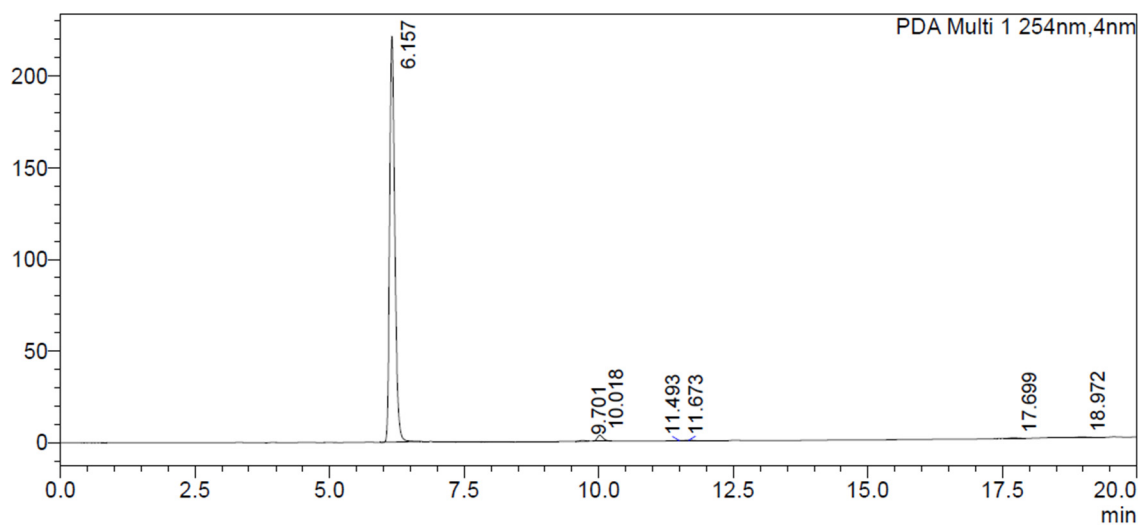

Peak Table

PDA Ch1 254nm

| Peak# | Ret. Time | Area    | Area%   |
|-------|-----------|---------|---------|
| 1     | 6.157     | 1466434 | 97.285  |
| 2     | 9.701     | 2943    | 0.195   |
| 3     | 10.018    | 24522   | 1.627   |
| 4     | 11.493    | 1582    | 0.105   |
| 5     | 11.673    | 3930    | 0.261   |
| 6     | 17.699    | 3674    | 0.244   |
| 7     | 18.972    | 4273    | 0.283   |
| Total |           | 1507358 | 100.000 |

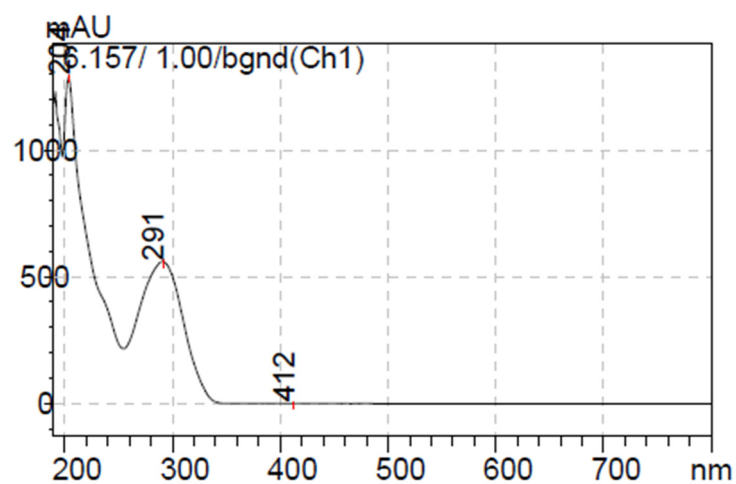

Supplement: s1 [file s1]
